# Supplementary material for: Downregulation of peroxiredoxin-3 by hydrophobic bile acid induces mitochondrial dysfunction and cellular senescence in human trophoblasts
Source: PubMed Central journal article supplement (PMC5154184; doi:10.1038/srep38946), 2016-12-13
Supplement: srep38946-s1.pdf [file srep38946-s1.pdf]

## **Supplementary information**

### **Downregulation of peroxiredoxin-3 by hydrophobic bile acid induces mitochondrial dysfunction and cellular senescence in human trophoblasts**

Wei-Bin Wu <sup>a,b</sup>, Ramkumar Menon <sup>c</sup>, Yue-Ying Xu <sup>a</sup>, Jiu-Ru Zhao <sup>a,b</sup>, Yan-Lin  
Wang <sup>d</sup>, Yuan Liu <sup>a</sup>, Hui-Juan Zhang <sup>a,b,\*</sup>

<sup>a</sup> Departments of Pathology and Bio-Bank, the International Peace Maternity and Child Health Hospital, Shanghai Jiao Tong University School of Medicine, Shanghai, China;

<sup>b</sup> Institute of Embryo-Fetal Original Adult Disease Shanghai Key laboratory for Reproductive Medicine, School of Medicine, Shanghai Jiao Tong University, Shanghai, China;

<sup>c</sup> Division of Maternal-Fetal Medicine and Perinatal Research, Department of Obstetrics and Gynecology, the University of Texas Medical Branch at Galveston, Galveston, Texas, United States of America;

<sup>d</sup> Prenatal Diagnosis Center & Fetal Medicine Unit, the International Peace Maternity and Child Health Hospital, Shanghai Jiao Tong University School of Medicine, Shanghai, China.

\*To whom correspondence should be addressed. Tel: 86-021-64070434-29905.

Fax: 86-021-64073896. Email: zhanghj815@126.com.

**Supplementary table S1. Serum bile acids concentration in the ICP patients of this study.**

| Patient No. | TBA level at delivery ( $\mu\text{M}$ ) | TBA peak during pregnancy ( $\mu\text{M}$ ) |
|-------------|-----------------------------------------|---------------------------------------------|
| 1           | 14.6                                    | 14.6                                        |
| 2           | 18.6                                    | 18.6                                        |
| 3           | 47.9                                    | 47.9                                        |
| 4           | 10.2                                    | 70                                          |
| 5           | 15.7                                    | 15.7                                        |
| 6           | 22.1                                    | 29.9                                        |
| 7           | 38.8                                    | 40.2                                        |
| 8           | 126.2                                   | 126.2                                       |
| 9           | 13.8                                    | 24.5                                        |
| 10          | 93.2                                    | 93.2                                        |
| 11          | 99.8                                    | 99.8                                        |
| 12          | 39.1                                    | 39.1                                        |
| 13          | 6.8                                     | 37.7                                        |
| 14          | 42.1                                    | 93.4                                        |
| 15          | 8.7                                     | 37.4                                        |
| 16          | 18.4                                    | 18.4                                        |
| 17          | 14.7                                    | 61.7                                        |
| 18          | 51.2                                    | 51.2                                        |
| 19          | 48.4                                    | 48.4                                        |
| 20          | 42.9                                    | 42.9                                        |
| 21          | 37.9                                    | 61.6                                        |
| 22          | 20.9                                    | 20.9                                        |
| 23          | 16.2                                    | 16.2                                        |
| 24          | 18.4                                    | 18.4                                        |
| 25          | 15.4                                    | 15.4                                        |
| 26          | 39.7                                    | 39.7                                        |
| 27          | 15.3                                    | 101.8                                       |
| 28          | 15.1                                    | 25.2                                        |
| 29          | 24.2                                    | 38                                          |
| 30          | 15.4                                    | 97.9                                        |
| 31          | 15.3                                    | 44.6                                        |
| 32          | 24.6                                    | 48.9                                        |
| 33          | 27.4                                    | 27.4                                        |
| 34          | 22                                      | 27.2                                        |
| 35          | 28.8                                    | 116.2                                       |
| 36          | 28.7                                    | 28.7                                        |
| 37          | 18.6                                    | 21.6                                        |
| 38          | 14.2                                    | 19.5                                        |

|    |       |       |
|----|-------|-------|
| 39 | 15.1  | 15.1  |
| 40 | 18.8  | 18.8  |
| 41 | 59    | 59    |
| 42 | 24.9  | 24.9  |
| 43 | 15.6  | 15.6  |
| 44 | 14.6  | 40.2  |
| 45 | 16.8  | 22.8  |
| 46 | 15.6  | 32.9  |
| 47 | 15.8  | 15.8  |
| 48 | 27.8  | 27.8  |
| 49 | 24    | 24    |
| 50 | 20.1  | 20.1  |
| 51 | 18.8  | 18.8  |
| 52 | 32.1  | 32.1  |
| 53 | 134.4 | 134.4 |
| 54 | 23.2  | 23.2  |
| 55 | 33.6  | 45.3  |
| 56 | 24.3  | 79.7  |
| 57 | 30.7  | 30.7  |
| 58 | 17.9  | 17.9  |
| 59 | 20.8  | 23.8  |
| 60 | 29.2  | 29.2  |
| 61 | 16.6  | 63.9  |
| 62 | 52.4  | 52.4  |
| 63 | 21.9  | 21.9  |
| 64 | 16.4  | 16.4  |
| 65 | 45.4  | 45.4  |
| 66 | 18.4  | 18.4  |
| 67 | 31.9  | 31.9  |
| 68 | 14.4  | 33.7  |
| 69 | 23.5  | 37.1  |
| 70 | 15.9  | 39.3  |

**Supplementary table S2. Antibodies used for immunoblot assay (IB) and immunohistochemistry (IHC).**

| <b>Antibodies</b>                                      | <b>Companies</b>                                      | <b>Dilution</b>           |
|--------------------------------------------------------|-------------------------------------------------------|---------------------------|
| Rabbit anti-PRDX3                                      | Abgent, Suzhou, China                                 | IB(1:1500)<br>IHC (1:100) |
| Rabbit anti- $\beta$ -Actin                            | Abmart Inc., Shanghai, China                          | IB(1:5000)                |
| Goat anti- P16 <sup>INK4A</sup>                        | R&D Systems, Minneapolis, MN, United States           | IB(1:1000)                |
| Rabbit anti-<br>P16 <sup>INK4A</sup>                   | Proteintech Group Inc., Chicago, IL, United States    | IHC (1:300)               |
| Rabbit anti-p63                                        | Cell Signaling Technology, Danvers, MA, United States | IHC (1:100)               |
| Rabbit anti-<br>P21 <sup>WAF1/CIP1</sup>               | Cell Signaling Technology, Danvers, MA, United States | IB (1:1000)<br>IHC (1:50) |
| Rabbit anti-<br>phospho-p38<br>(Thr180/Tyr182)<br>MAPK | Cell Signaling Technology, Danvers, MA, United States | IB(1:1000)                |
| Rabbit anti- p38<br>MAPK                               | Cell Signaling Technology, Danvers, MA, United States | IB(1:1000)                |
| Mouse anti-GAPDH                                       | Abmart Inc., Shanghai, China                          | IB(1:5000)                |
| HRP-conjugated<br>Goat anti-rabbit IgG                 | Jackson ImmunoResearch, West Grove, PA, United States | IB(1:2500)                |
| HRP-conjugated                                         | Jackson ImmunoResearch, West Grove, PA, United States | IB(1:2000)                |

|                                           |                                                          |            |
|-------------------------------------------|----------------------------------------------------------|------------|
| Goat anti-mouse<br>IgG                    | States                                                   |            |
| HRP-conjugated<br>Rabbit anti-goat<br>IgG | Jackson ImmunoResearch, West Grove, PA, United<br>States | IB(1:2000) |

**Supplementary table S3. Primers for qPCR assay**

| <b>Gene</b>         | <b>Alias</b>             | <b>Forward Primer</b>       | <b>Reverse Primer</b>       |
|---------------------|--------------------------|-----------------------------|-----------------------------|
| For RT-qPCR assay   |                          |                             |                             |
| <i>PRDX1</i>        | PRX1                     | TCTCCAAGCAGAAGTGAG<br>CG    | GAAAGGCTGGTCTCTCCACC        |
| <i>PRDX2</i>        | PRX2                     | GTCCAGGCCTTCCAGTAC<br>AC    | CTGTCATCCACGTTGGGCTT        |
| <i>PRDX3</i>        | prx-III                  | ACAGCCGTTGTCAATGGA<br>GAG   | ACGTCGTGAAATTCGTTAGCT<br>T  |
| <i>PRDX4</i>        | PRX-4                    | AGAGGAGTGCCACTTCTA<br>CG    | GGAAATCTTCGCTTTGCTTAG<br>GT |
| <i>PRDX5</i>        | prx-V                    | CTTCACCCCTGGATGTTC<br>CAA   | AGGCATCATTAACTCAGAC<br>AG   |
| <i>PRDX6</i>        | PRX                      | GACTCATGGGGCATTCTC<br>TTC   | CAAGCTCCCGATTCCCTATCATC     |
| <i>RNA18S<br/>5</i> | <i>18S rRNA</i>          | CAGCCACCCGAGATTGA<br>GCA    | TAGTAGCGACGGGCGGTGTG        |
| MT-CO1              | COX1                     | ACTATACTACTACTAACAG<br>ACCG | GGTTCTTTTTTCCGGAGTA         |
| MT-ND1              | ND1                      | TAGTCTCAGGCTTTAACA<br>TCG   | AGTTGGTCGTAGCGGAAT          |
| MT-ND6              | ND6                      | GGGGAATGATGGTTGTCT          | TCATACTCTTTCACCCACAG        |
| CCNA2               | Cyclin A2                | CGCTGGCGGTACTIONGAAG<br>TC  | GAGGAACGGTGACATGCTCAT       |
| CCNB1               | Cyclin B1                | TTGGGGACATTGGTAACA<br>AAGTC | ATAGGCTCAGGCGAAAGTTTT<br>T  |
| CCND3               | Cyclin D3                | AACTTGGCTGAGCAGAG<br>CAC    | CATCCGAACAGAGCCAGTCT        |
| CCNE1               | Cyclin E1                | ACTCAACGTGCAAGCCTC<br>G     | GCTCAAGAAAGTGCTGATCCC       |
| CDK2                |                          | GAGCCTGGGCTGCATCTT<br>TG    | CCCCTTGGGGAAACTTGGC         |
| CDK4                |                          | ATGGCTACCTCTCGATAT<br>GAGC  | CATTGGGGACTCTCACACTCT       |
| CDK6                |                          | TGCACAGTGTACGAACA<br>GA     | AGATCGCGATGCACTACTCG        |
| CDKN2A              | p16 <sup>INK4A</sup>     | ACTTCAGGGGTGCCACAT<br>TC    | CGACCCTGTCCCTCAAATCC        |
| CDKN1A              | p21 <sup>WAF1/CIP1</sup> | GGATGTCCGTCAGAACCC          | GCTCCAGGCGAAGTCA            |
| For qPCR assay      |                          |                             |                             |
| mtDNA               |                          | CCCTAAAACCCGCCACAT<br>CT    | GAGCGATGGTGAGAGCTAAG<br>GT  |

|      |  |                          |                      |
|------|--|--------------------------|----------------------|
| gDNA |  | CAACTTCATCCACGTTCA<br>CC | GAAGAGCCAAGGACAGGTAC |
|------|--|--------------------------|----------------------|

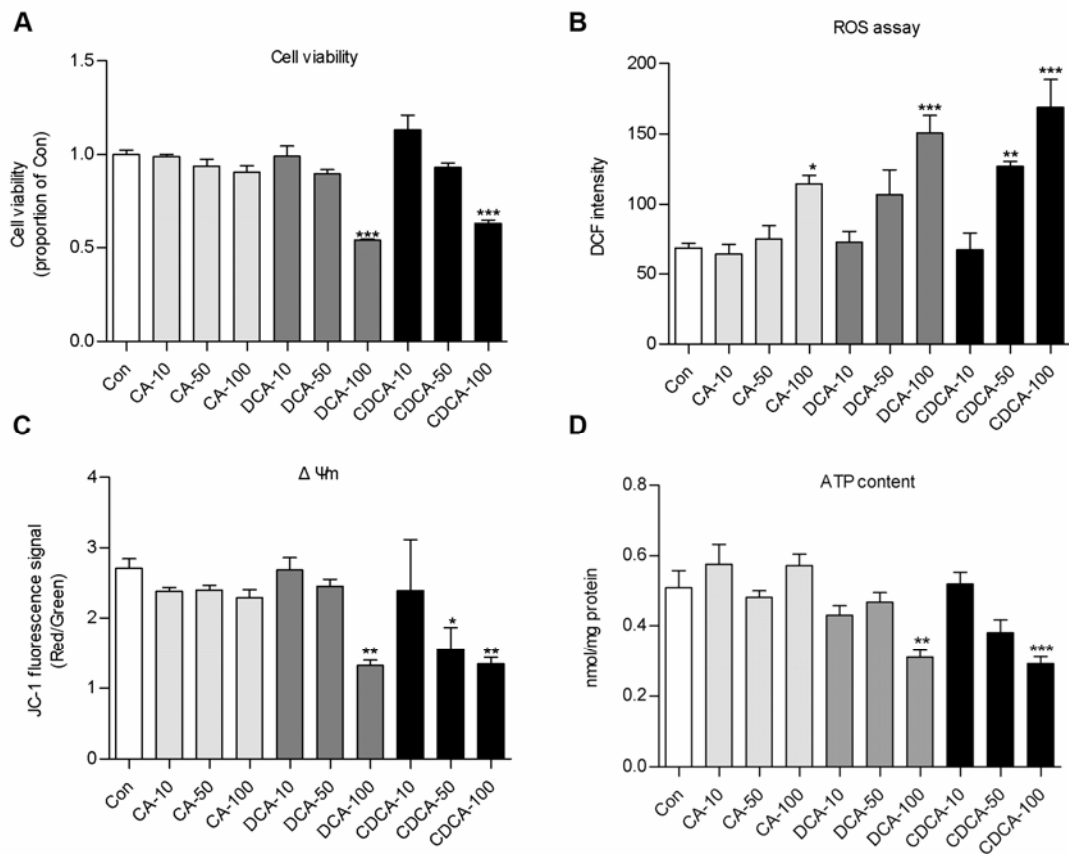

**Supplementary Fig. S1.** Primary trophoblasts cells (A–C) and villous explants from term placenta (D) were treated with vehicle (Con), 10, 50, or 100  $\mu\text{M}$  cholic acid (CA), deoxycholic acid (DCA) and chenodeoxycholic acid (CDCA) for 24 hours. (A) Cell viability, (B) ROS production, (C) mitochondrial membrane potential ( $\Delta\Psi_m$ ) and (D) adenosine triphosphate (ATP) content were assayed using corresponding kits. The ATP level was shown as nmol/mg protein and the others were expressed as arbitrary units. (\* $p < 0.05$ , \*\* $p < 0.01$ , \*\*\* $p < 0.001$  versus the Con group)



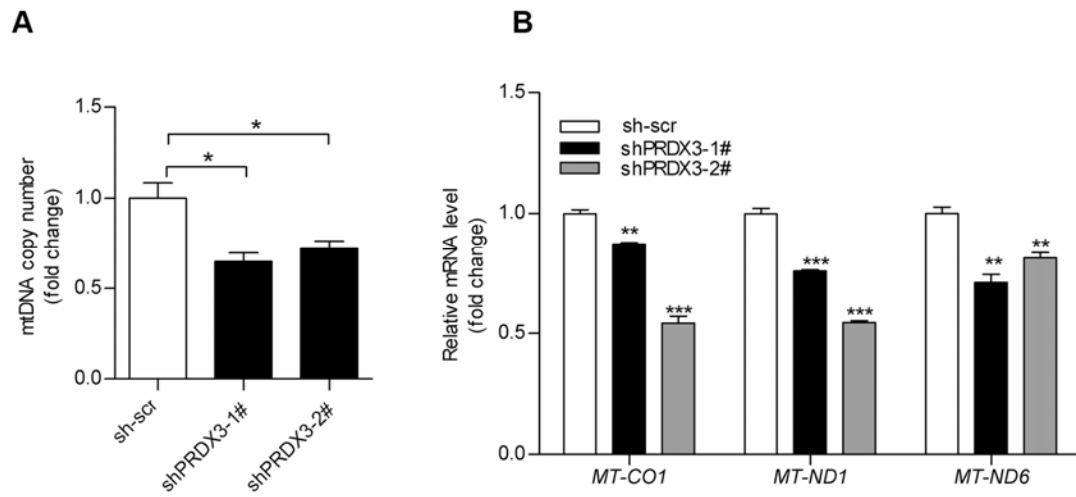

**Supplementary Fig. S2.** qRT-PCR and qPCR analysis was applied to detect (A) mitochondrial DNA (mtDNA) copy number and (B) mitochondrial gene transcripts (MT-CO1, MT-ND1 and MT-ND6) levels in PRDX3-knockdown cells (shPRDX3-1# and shPRDX3-2#) or the control cells (sh-scr). (\* $p < 0.05$ , \*\* $p < 0.01$ , \*\*\* $p < 0.001$  versus the sh-scr group)

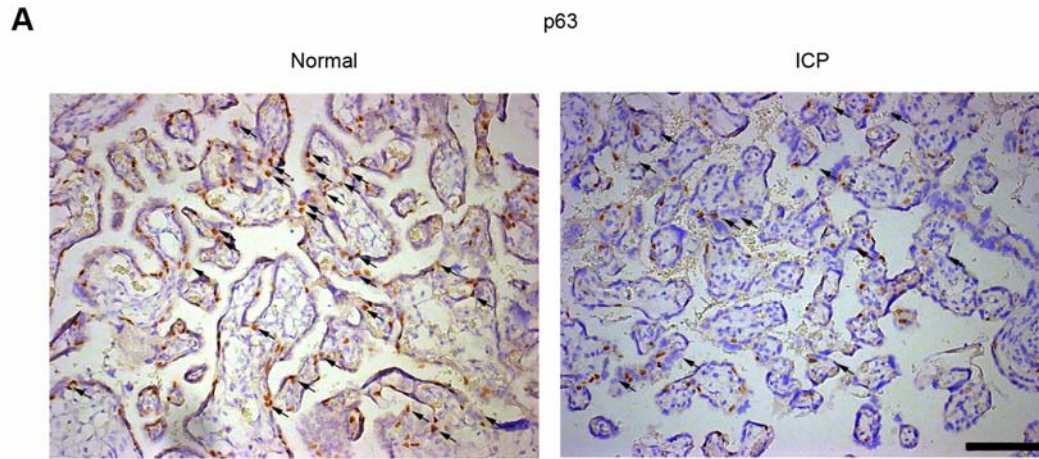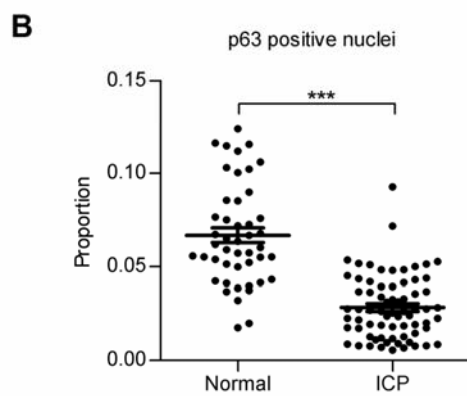

**Supplementary Fig. S3.** (A) Immunohistochemistry staining of p63 for cytotrophoblasts in term placentas from ICP patients and normal pregnancies. Original magnification 200 x, bar: 100  $\mu$ m. (B) The proportion of positive labelled nuclei / total number of trophoblastic nuclei counted was determined in a minimum of 1000 trophoblasts from 10 random fields / section. Statistical analysis of immunostaining of p63 in placentas was applied ( $n = 46$  for normal pregnancy,  $n = 70$  for ICP,  $***p < 0.001$ , Mann-Whitney test).

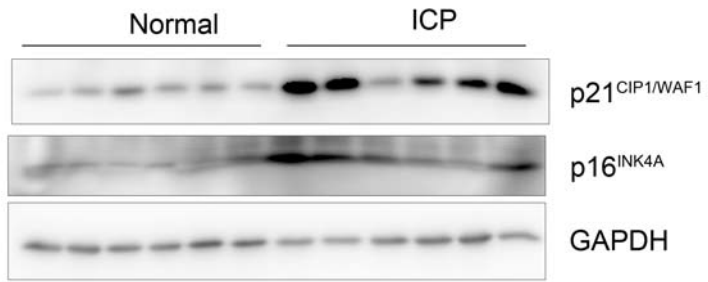

**Supplementary Fig. S4.** Immunoblot assay for detecting p21<sup>WAF1/CIP</sup> and p16<sup>INK4A</sup> protein level in placental tissues from normal pregnancies and ICP patients. GAPDH was used as an internal loading control.

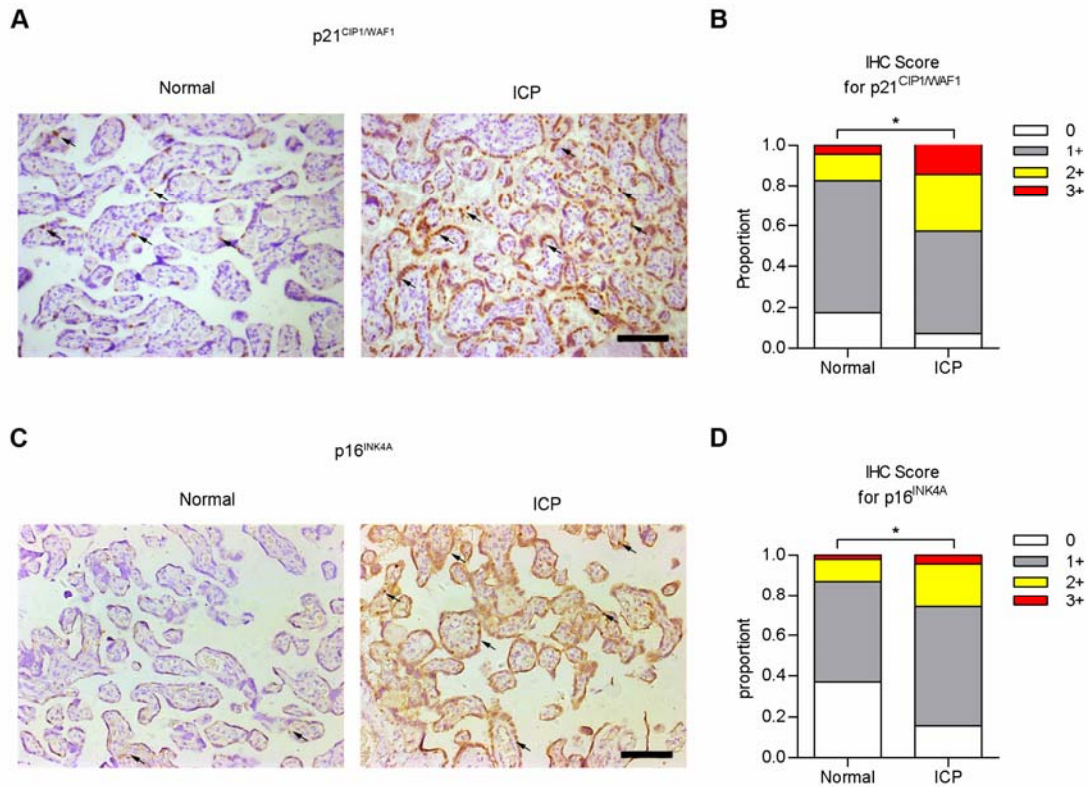

**Supplementary Fig. S5.** Immunohistochemistry analysis and score of p21<sup>CIP1/WAF1</sup> (A, B) and p16<sup>INK4A</sup> (C, D) in trophoblasts of placental tissues. The expressions of p21<sup>CIP1/WAF1</sup> and p16<sup>INK4A</sup> were scored as: 0 (less than 1% of positive cells), 1+ (1-10% of positive cells), 2+ (10-20% of positive cells), 3+ (more than 20% of positive cells). Original magnification 200x, bar 100  $\mu$ m. Statistically analysis of immunostaining signal of p21<sup>CIP1/WAF1</sup> (B) and p16<sup>INK4A</sup> (D) in placentas (n = 46 for normal, n = 70 for ICP, \*p < 0.05, chi-square test).

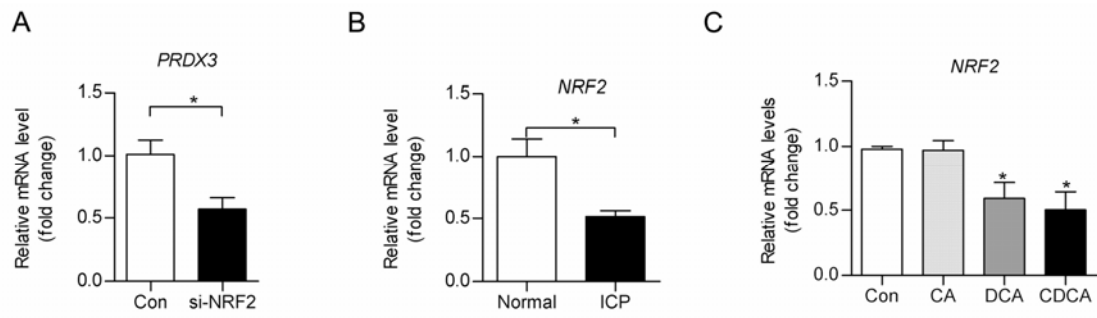

**Supplementary Fig. S6.** (A) mRNA level of PRDX3 in HTR8-SVneo cells transfected with NRF2 siRNA, (B) mRNA level of NRF2 in placentas from normal pregnancies or ICP patients and (C) mRNA level of NRF2 in HTR8-SVneo cells treated with 100  $\mu$ M CA, DCA or CDCA was quantified by qRT-PCR assay with normalization to 18s rRNA level. (\* $p < 0.05$  versus the Con or Normal group)

For Fig.1A

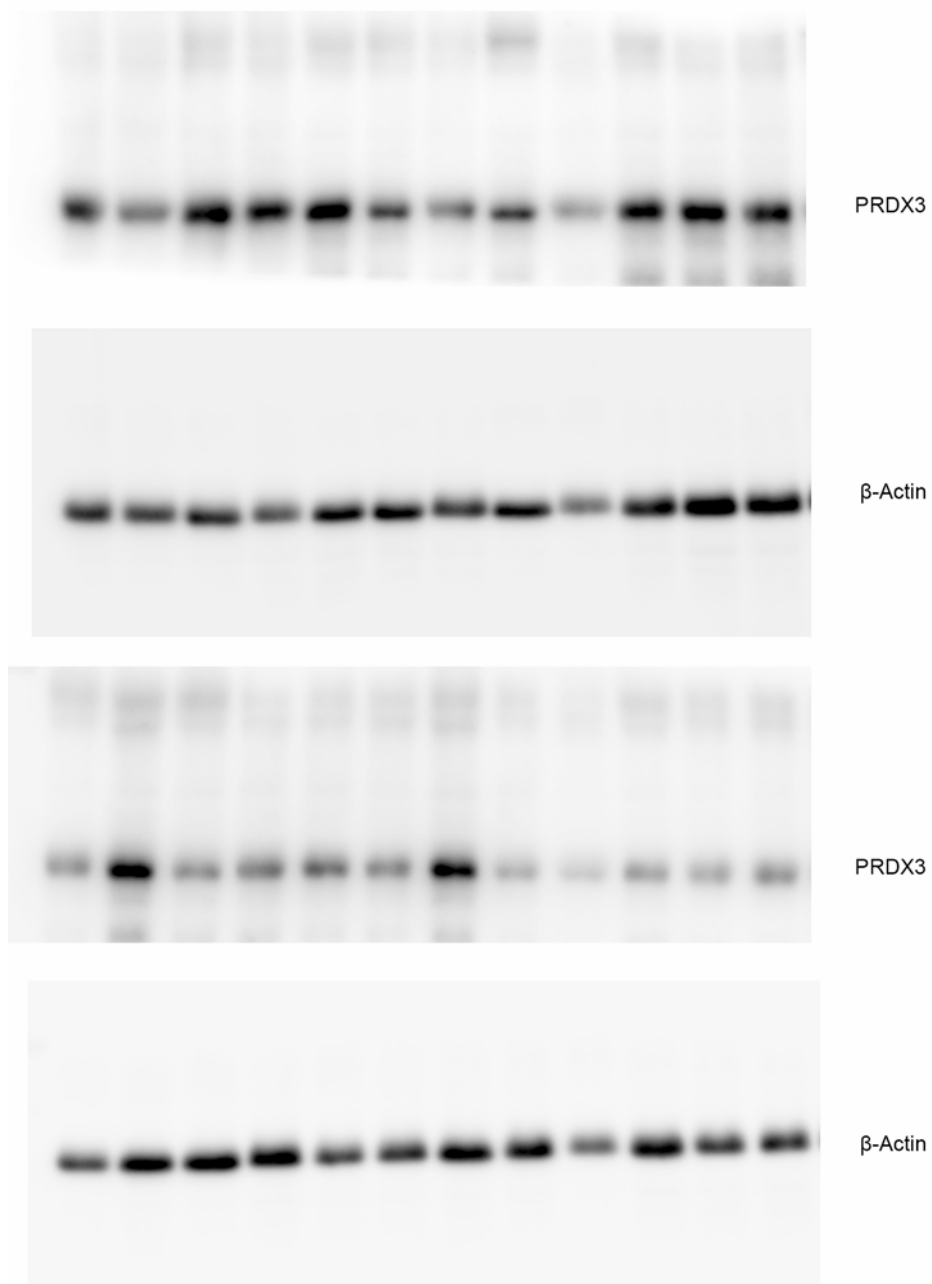

**Supplementary Fig.S7.** Full-length blots for Fig.1A.

For Fig2.H

JAR

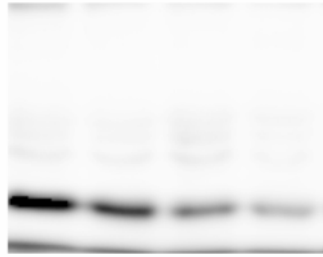

PRDX3

HTR8

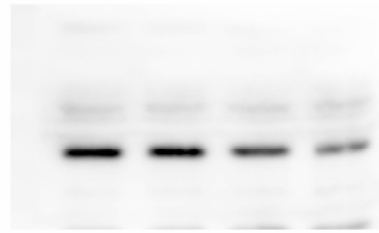

PRDX3

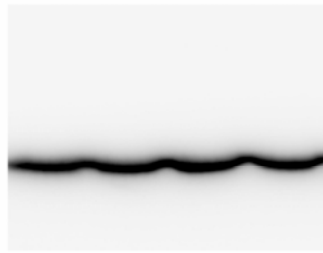

$\beta$ -Actin

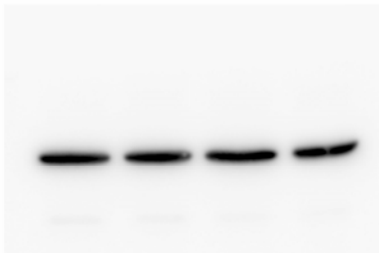

$\beta$ -Actin

For Fig2.J

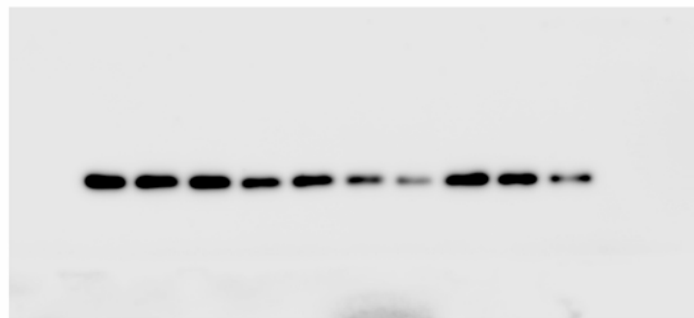

PRDX3

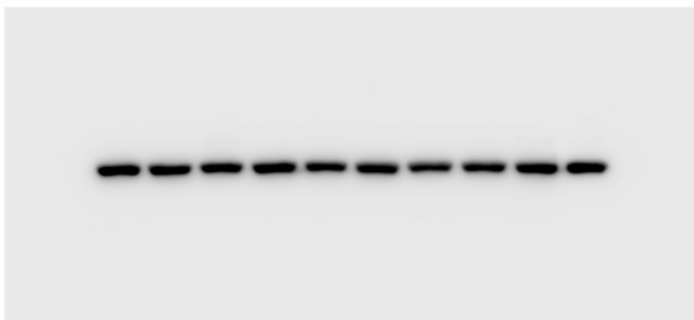

$\beta$ -Actin

**Supplementary Fig.S8.** Full-length blots for Fig.2H, J.

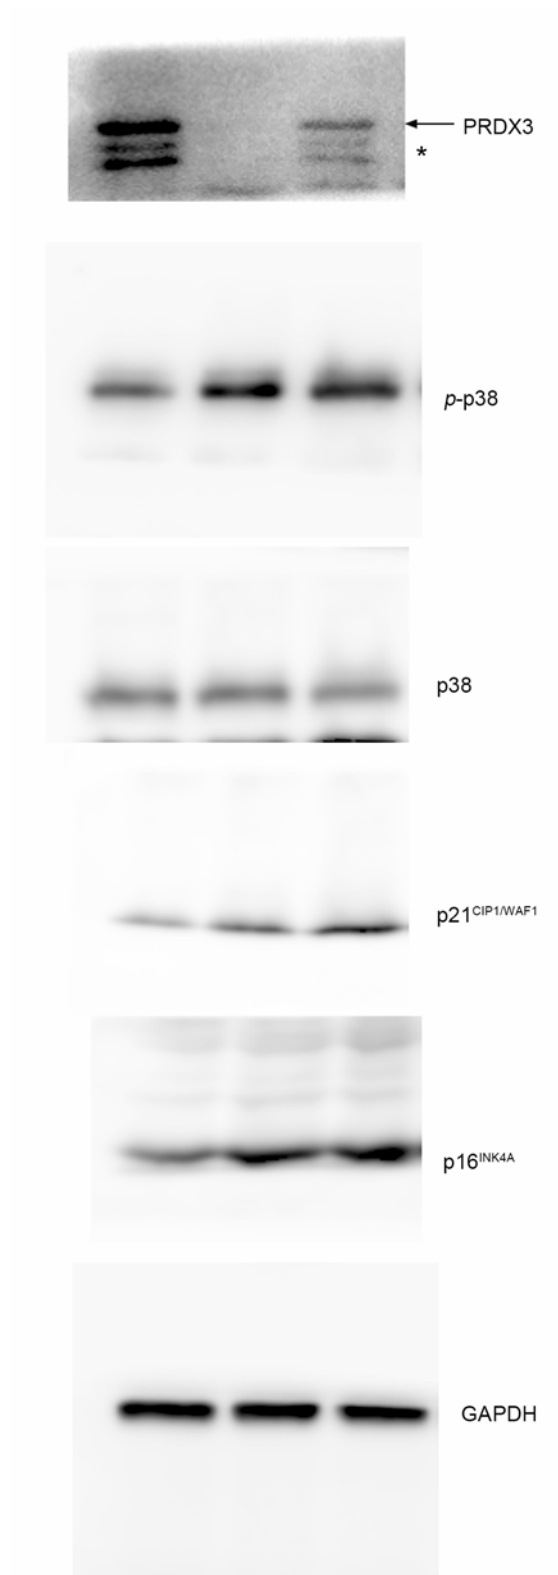

**Supplementary Fig.S9.** Full-length blots for Fig.6D. \* non-specific bands
